# Supplementary material for: Effects of Glutamine, Curcumin and Fish Bioactive Peptides Alone or in Combination on Intestinal Permeability in a Chronic-Restraint Stress Model
Source: MDPI journal article supplement (doi:10.3390/ijms24087220), 2023-04-13
Supplement: s1 [file s1]

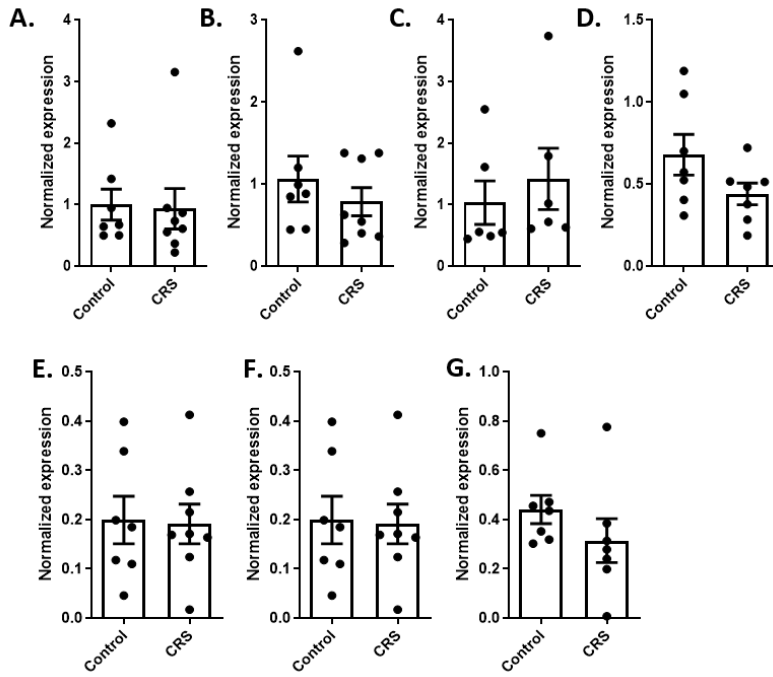

**Figure S1.** Effect of CRS on colonic inflammation related proteins and tight junction proteins gene expression (A) CXCL1, (B) TNF $\alpha$ , (C) IL1 $\beta$  and (D) IL10, (E) Occludin, (F) Claudin 1 and (G) ZO-1 gene expression in control vs. CRS groups. n = 7-8 per group.
